# Supplementary material for: Back to Nature: Medicinal Plants as Promising Sources for Antibacterial Drugs in the Post-Antibiotic Era
Source: MDPI journal article supplement (doi:10.3390/plants12173077), 2023-08-28
Supplement: s1 [file s1]

## Supplementary materials

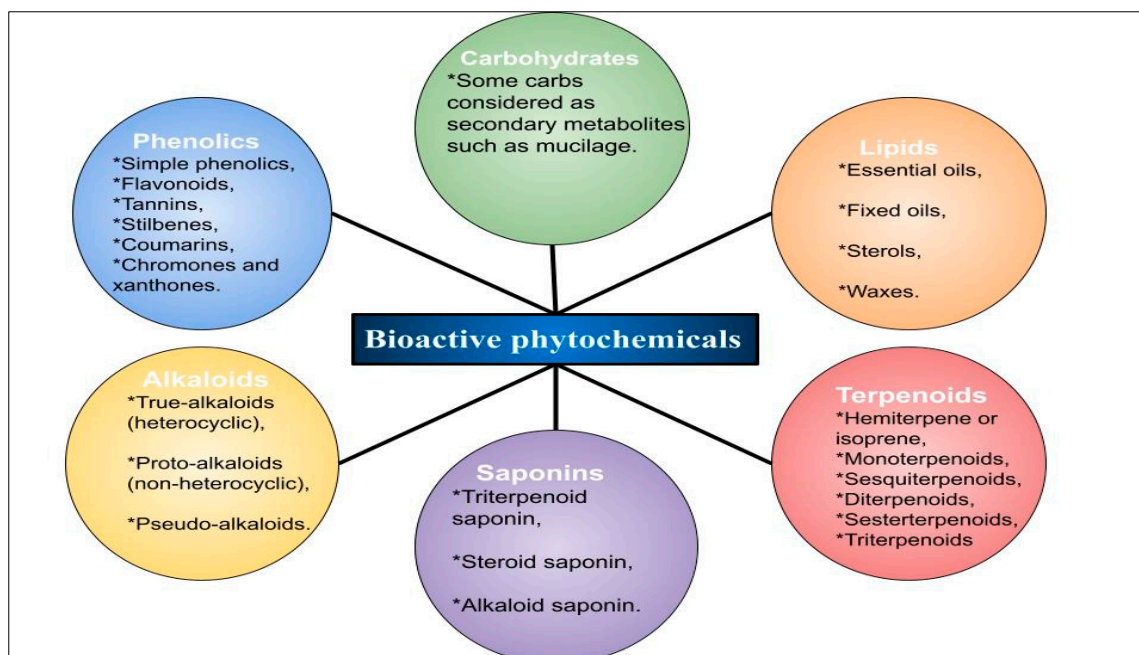

**Figure S1.** The main classes of bioactive phytochemicals that may include antibacterial agents

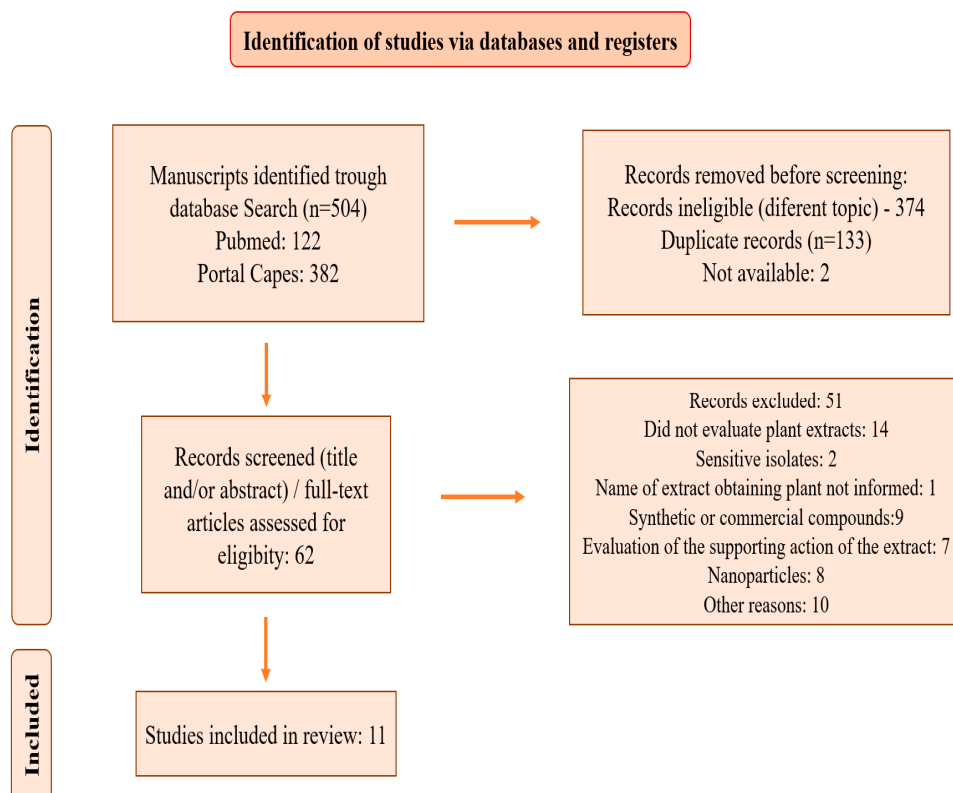

**Figure S2:** Flowchart of the selection of articles to be evaluated in the current review
